# Supplementary material
Source: PubMed Central journal article supplement (PMC3081662)
Supplement: NIHMS271103-supplement-supplement_1.pdf [file NIHMS271103-supplement-supplement_1.pdf]

Supplemental Materials

Supplemental Tables

**Online Table 1: Mean performances and standard deviation of the groups in the 2,3,4,5,6-profile models of the latent profile analysis in the Cardiovascular Health Study**

|                   | <i>2-profile Model</i> |            |            |           |           |
|-------------------|------------------------|------------|------------|-----------|-----------|
|                   | 1                      | 2          |            |           |           |
| N                 | 670                    | 4406       |            |           |           |
| DSST              | 32.1±14.2              | 39.3±13.6  |            |           |           |
| DSST, z-score     | -0.46±1.02             | 0.07±0.98  |            |           |           |
| CESD              | 15.1±3.9               | 4±3.1      |            |           |           |
| Gait speed, m/sec | 0.7±0.2                | 0.9±0.2    |            |           |           |
|                   | <i>3-profile Model</i> |            |            |           |           |
|                   | 1                      | 2          | 3          |           |           |
| N                 | 1145                   | 3691       | 240        |           |           |
| DSST              | 32.4±14.1              | 40.5±13.2  | 34.4±14    |           |           |
| DSST, z-score     | -0.43±1.02             | 0.15±0.95  | -0.29±1    |           |           |
| CESD              | 10.3±2.3               | 3.1±2.3    | 19.4±3.1   |           |           |
| Gait speed, m/sec | 0.8±0.2                | 0.9±0.2    | 0.8±0.2    |           |           |
|                   | <i>4-profile Model</i> |            |            |           |           |
|                   | 1                      | 2          | 3          | 4         |           |
| N                 | 3133                   | 188        | 945        | 810       |           |
| DSST              | 43.6±11.3              | 33.5±13.9  | 34.9±13.5  | 23±9.8    |           |
| DSST, z-score     | 0.38±0.82              | -0.35±0.99 | -0.25±0.97 | -1.1±0.7  |           |
| CESD              | 3±2.4                  | 20.3±2.9   | 11.4±2.3   | 4.8±2.4   |           |
| Gait speed, m/sec | 1±0.2                  | 0.7±0.2    | 0.8±0.2    | 0.6±0.2   |           |
|                   | <i>5-profile Model</i> |            |            |           |           |
|                   | 1                      | 2          | 3          | 4         | 5         |
| N                 | 196                    | 351        | 1148       | 2763      | 618       |
| DSST              | 33.6±13.3              | 22.3±9.8   | 25.8±9.8   | 44.9±10.8 | 42.9±10.7 |
| DSST, z-score     | -0.35±0.96             | -1.16±0.71 | -0.91±0.7  | 0.47±0.78 | 0.32±0.77 |
| CESD              | 20.2±3                 | 11.6±2.1   | 4.6±2.4    | 2.7±2.2   | 11.1±2.3  |
| Gait speed, m/sec | 0.73±0.2               | 0.62±0.2   | 0.7±0.2    | 1±0.2     | 0.9±0.2   |

DSST: Digit Symbol Substitution Test; CESD: Center for Epidemiological Depression Scale

**Online Table 2:** Associations of other vascular factors with being impaired in the three domains of mobility, cognition and mood and the role of white matter hyperintensities

|                                                                                                                                                                                 | <i>Models* without WMH</i> |              |              |                | <i>Models** with WMH and vascular factor</i> |              |              |                |
|---------------------------------------------------------------------------------------------------------------------------------------------------------------------------------|----------------------------|--------------|--------------|----------------|----------------------------------------------|--------------|--------------|----------------|
|                                                                                                                                                                                 | <b>HR</b>                  | <b>95%CI</b> | <b>95%CI</b> | <b>P-VALUE</b> | <b>HR</b>                                    | <b>95%CI</b> | <b>95%CI</b> | <b>P-VALUE</b> |
| Diabetes                                                                                                                                                                        | 1.62                       | 1.27         | 2.06         | 0.0001         | 1.55                                         | 1.16         | 2.07         | 0.003          |
| Coronary Heart Disease                                                                                                                                                          | 1.26                       | 1.03         | 1.54         | 0.023          | 1.32                                         | 1.05         | 1.67         | 0.021          |
| Congestive Heart Failure                                                                                                                                                        | 1.45                       | 1.20         | 1.74         | 0.0001         | 1.43                                         | 1.15         | 1.78         | 0.018          |
| WMH: White matter hyperintensities                                                                                                                                              |                            |              |              |                |                                              |              |              |                |
| *A separate model was created for each vascular factor and models were adjusted for: age, gender, race, education, cigarette smoking, stroke, and total KCALS physical activity |                            |              |              |                |                                              |              |              |                |
| **: For each vascular factor, we present the HR from the model including the vascular factor, WMH, and the above covariates.                                                    |                            |              |              |                |                                              |              |              |                |
| If the p value between the model with and without WMH becomes >0.05 we considered WMH to be a mediator                                                                          |                            |              |              |                |                                              |              |              |                |

**Online Table 3:** The association of hypertension and cerebral white matter hyperintensities with the remainder group

|                          | <i>Unadjusted</i>           |                | <i>Adjusted*</i>            |                |
|--------------------------|-----------------------------|----------------|-----------------------------|----------------|
|                          | <b>HR</b>                   | <b>P-VALUE</b> | <b>HR</b>                   | <b>P-VALUE</b> |
| <b>Separate Models</b>   |                             |                |                             |                |
| Hypertension             | 0.93, 95% CI<br>(.80-1.08)  | 0.36           | .88, 95% CI<br>(0.76-1.03)  | 0.10           |
| WMH grade                | 1.08, 95% CI<br>(1.03-1.13) | 0.0017         | 1.05, 95% CI<br>(1.00-1.11) | 0.05           |
| <b>Combined Models**</b> |                             |                |                             |                |
| Hypertension             | 0.88, 95% CI<br>(0.75-1.03) | 0.11           | 0.85, 95% CI<br>(0.72-1.01) | 0.07           |
| WMH grade                | 1.08, 95%CI<br>(1.03-1.13)  | 0.0009         | 1.06, 95%CI<br>(1.01-1.11)  | 0.03           |

WMH: Cerebral white matter hyperintensities; HR: Hazard Ratio; CI: Confidence interval

\*Adjusted for: age, gender, ace, education, cigarette smoking, stroke, and total KCALS physical activity (antihypertensives in the WMH model).

\*\* : Combined models include WMH and hypertension in the same model whereas separate model includes only WMH or hypertension
